# Supplementary material for: Effect of extracellular organic matter (EOM) accumulation on algal proliferation and disinfection by-product precursors during cyclic cultivation
Source: Royal Society of Chemistry journal article supplement (doi:10.1039/d4ew00207e), 2024-01-01
Supplement: d4ew00207e1.pdf [file d4ew00207e1.pdf]

## *Supporting file*

### **Effect of extracellular organic matter (EOM) accumulation on algal proliferation and disinfection by-products precursors during cyclic cultivation**

\*Jr-Lin Lin<sup>1,2</sup>, Fahrudin Sidik<sup>1</sup>

<sup>1</sup>Department of Environmental Engineering, Chung Yuan Christian University, Chung-Li, Taiwan, ROC.

<sup>2</sup>Center for Environmental Risk Management, College of Engineering, Chung Yuan Christian University, Chung-Li, Taiwan, ROC.

-----  
**\*Corresponding Author:**

Dr. Jr-Lin Lin ; E-mail: [jrlin@cycu.edu.tw](mailto:jrlin@cycu.edu.tw) ; Tel: +886-3-2654904

**Table S1.** Variations of  $\text{NO}_3^-$  and  $\text{PO}_4^{3-}$  concentration for *Chlorella sp.* and *M. aeruginosa* during cyclic culturing.

| Culturing time (day) | <i>Chlorella sp.</i>          |         |         |                           |         |         |
|----------------------|-------------------------------|---------|---------|---------------------------|---------|---------|
|                      | $\text{NO}_3^-$ (mg/L)        |         |         | $\text{PO}_4^{3-}$ (mg/L) |         |         |
|                      | Round 1                       | Round 2 | Round 3 | Round 1                   | Round 2 | Round 3 |
| 0                    | 247.10                        | 247.10  | 247.10  | 11.30                     | 11.30   | 11.30   |
| 4                    | 43.02                         | 42.63   | 43.66   | 1.27                      | 1.02    | 0.89    |
| 8                    | 41.10                         | 42.48   | 41.67   | 0.04                      | 0.46    | 0.53    |
| 12                   | 40.08                         | 40.70   | 41.55   | 0.03                      | 0.02    | 0.04    |
| Culturing time (day) | <i>Microcystis aeruginosa</i> |         |         |                           |         |         |
|                      | $\text{NO}_3^-$ (mg/L)        |         |         | $\text{PO}_4^{3-}$ (mg/L) |         |         |
|                      | Round 1                       | Round 2 | Round 3 | Round 1                   | Round 2 | Round 3 |
| 0                    | 247.10                        | 247.10  | 247.10  | 11.30                     | 11.30   | 11.30   |
| 4                    | 179.56                        | 183.08  | 178.50  | 4.41                      | 4.24    | 5.60    |
| 8                    | 183.87                        | 181.30  | 176.43  | 4.14                      | 4.22    | 6.83    |
| 12                   | 179.91                        | 176.07  | 173.78  | 2.40                      | 2.03    | 3.73    |

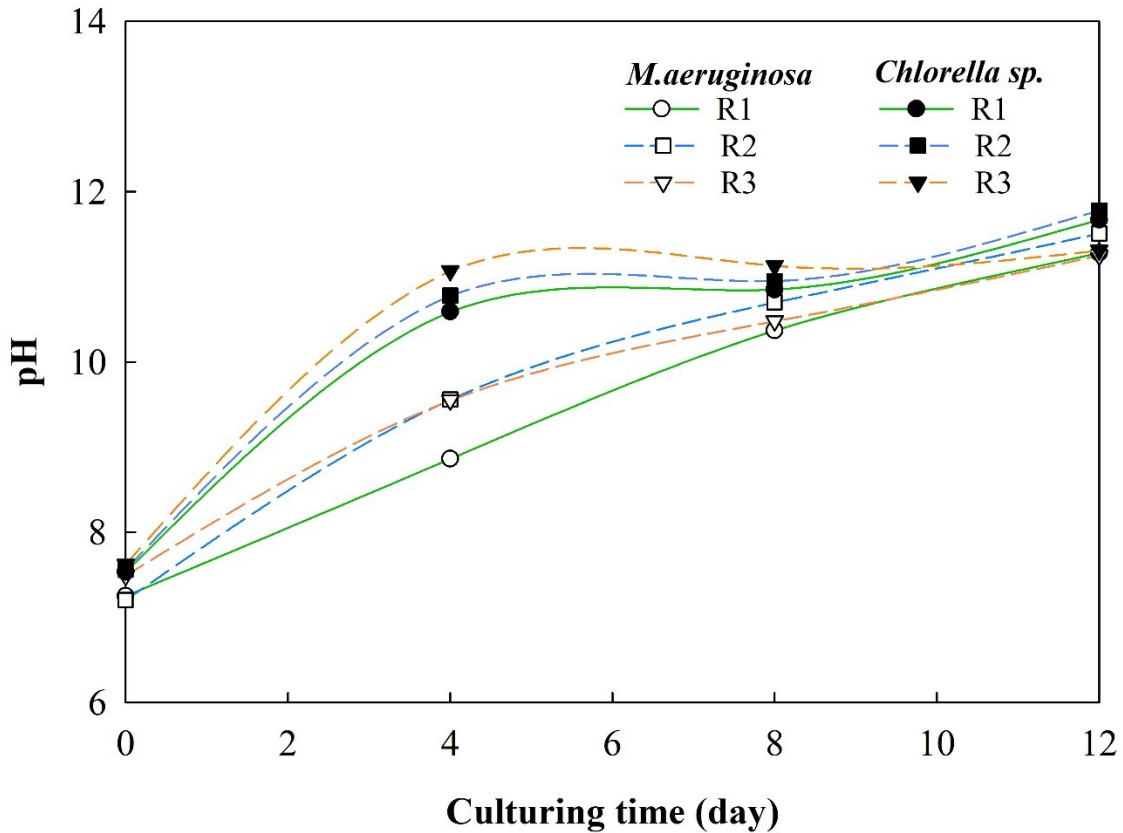

**Figure S1.** pH variations for *C. vulgaris* and *M. aeruginosa* during three rounds of cyclic algal culturing
